# Supplementary material
Source: MDPI journal article supplement (https://www.mdpi.com/2073-4433/15/4/424)
Supplement: s1 [file s1]

**Electronic supplementary materials:**

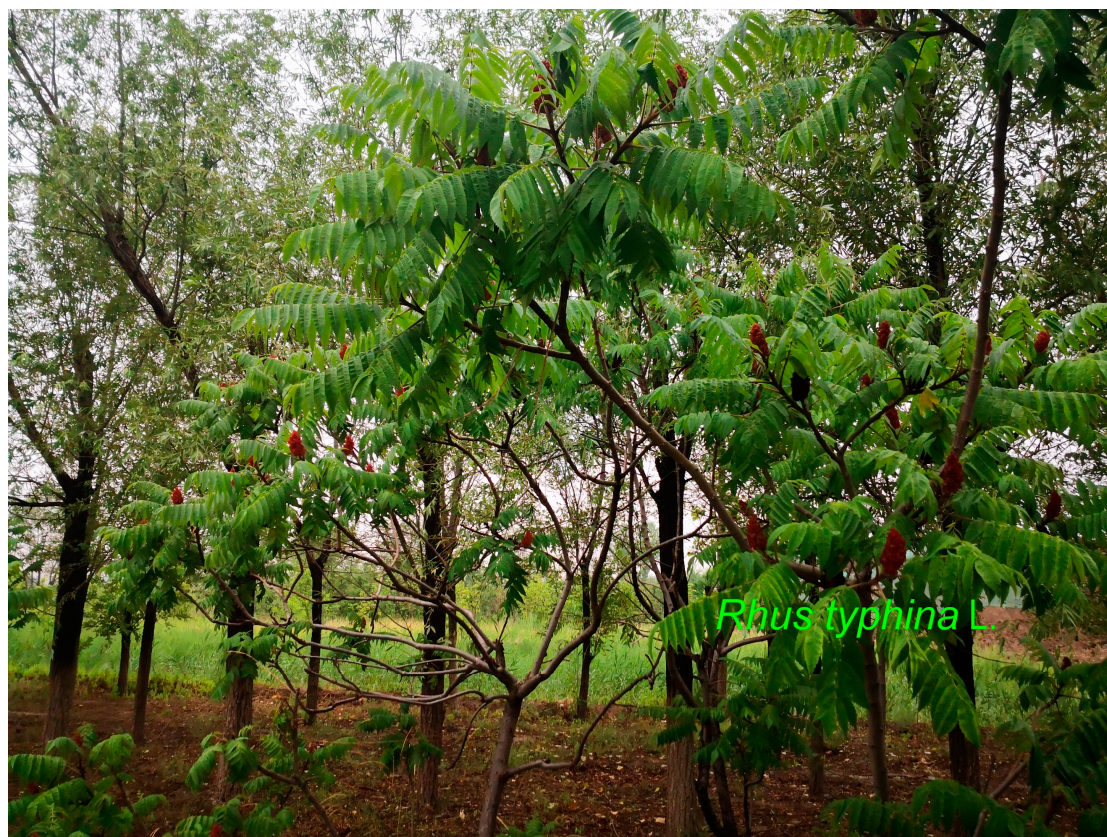

(a)



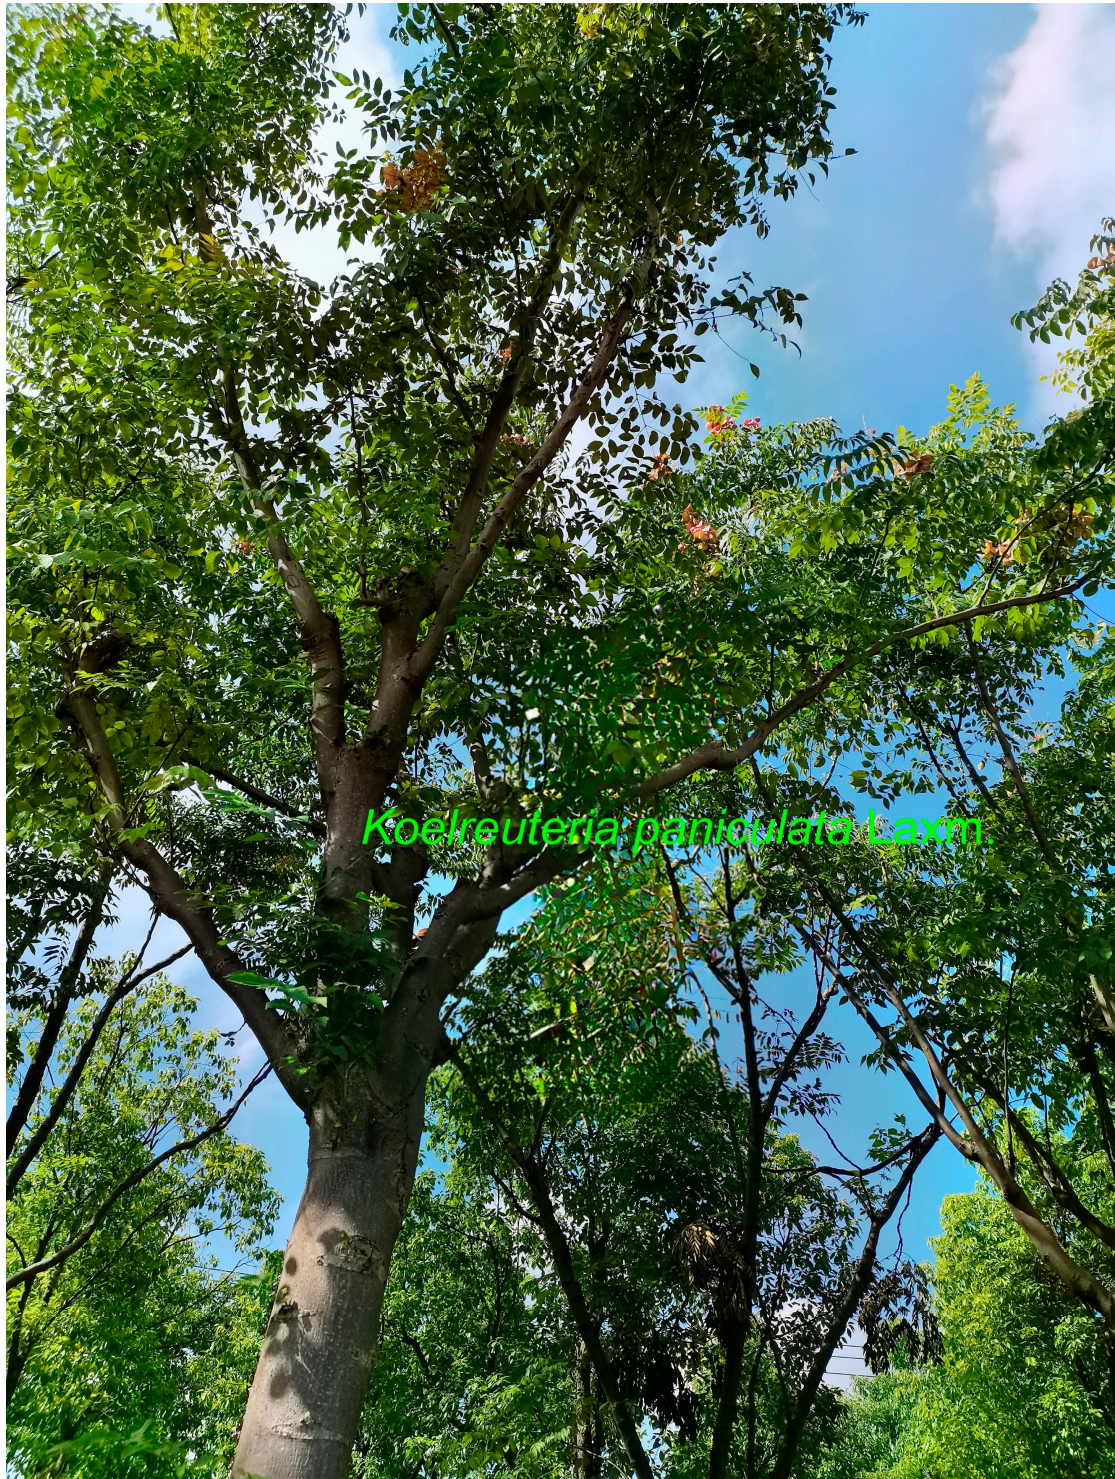

(b)

**Figure S1.** The photo of the environment in which the two trees grow (**a**, *Rhus typhina* L.; **b**, *Koelreuteria paniculata* Laxm.).
